# Supplementary material for: Overexpression of Pleckstrin Homology Domain-Containing Family A Member 4 Is Correlated with Poor Prognostic Outcomes and Immune Infiltration in Lower-Grade Glioma
Source: Hindawi journal article supplement (doi:10.1155/2022/1292648), 2022-11-11
Supplement: f1 [file 1292648.f1.pdf]

## Supplement Figure 1

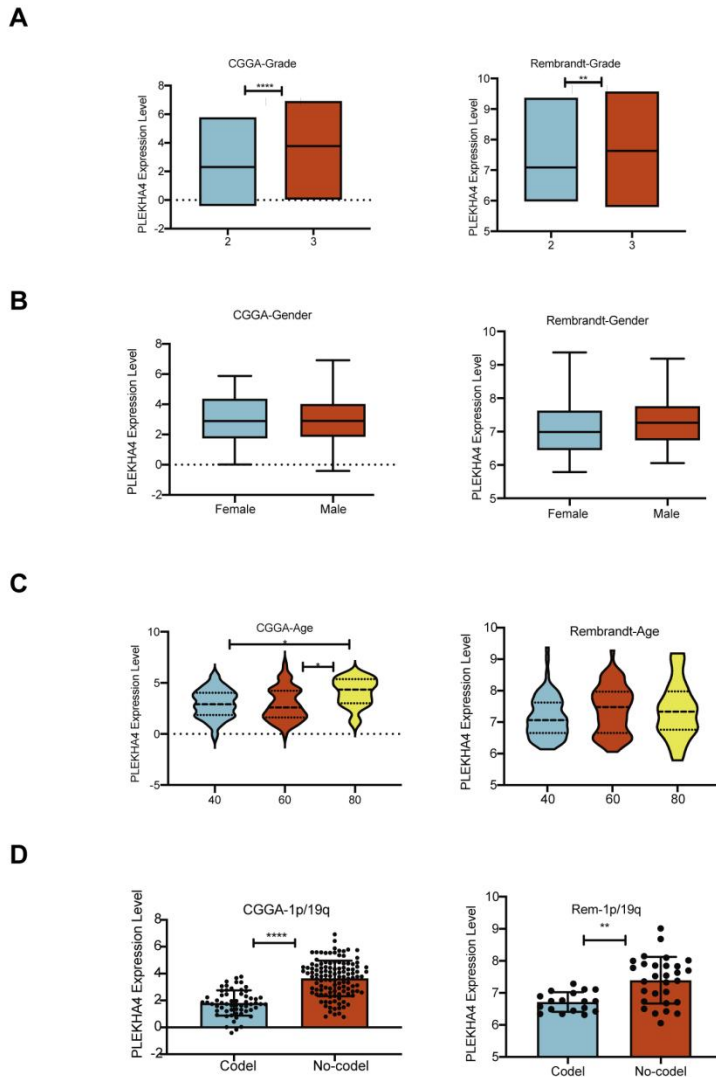

**Supplement Figure 1.** Association of PLEKHA4 expression with clinical parameters.

(A) disease stage; (B) gender (C) age (D) 1p/19q code. \* $P < 0.05$ ; \*\* $P < 0.01$ ; \*\*\* $P <$

0.001; ns not significant.

## Supplement Figure2

CGGA

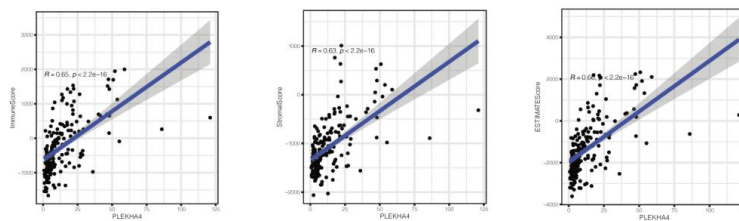

Rembrandt

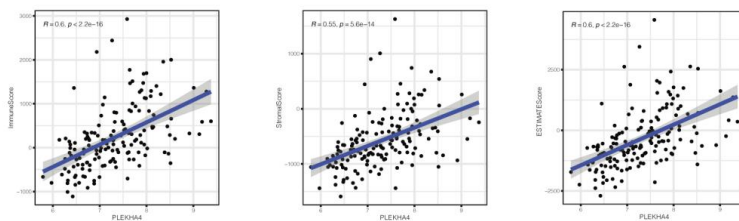

### Supplement Figure 2. Associations between the PLEKHA4

expression and immune infiltration level in LGG in CGGA and

Rembrandt database.(A) The relationship between the expression of

PLEKHA4 and the immune score of in CGGA LGG sample(B) The

relationship between the expression of PLEKHA4 and the immune

score of in Rembrandt LGG sample

### Supplement Figure3

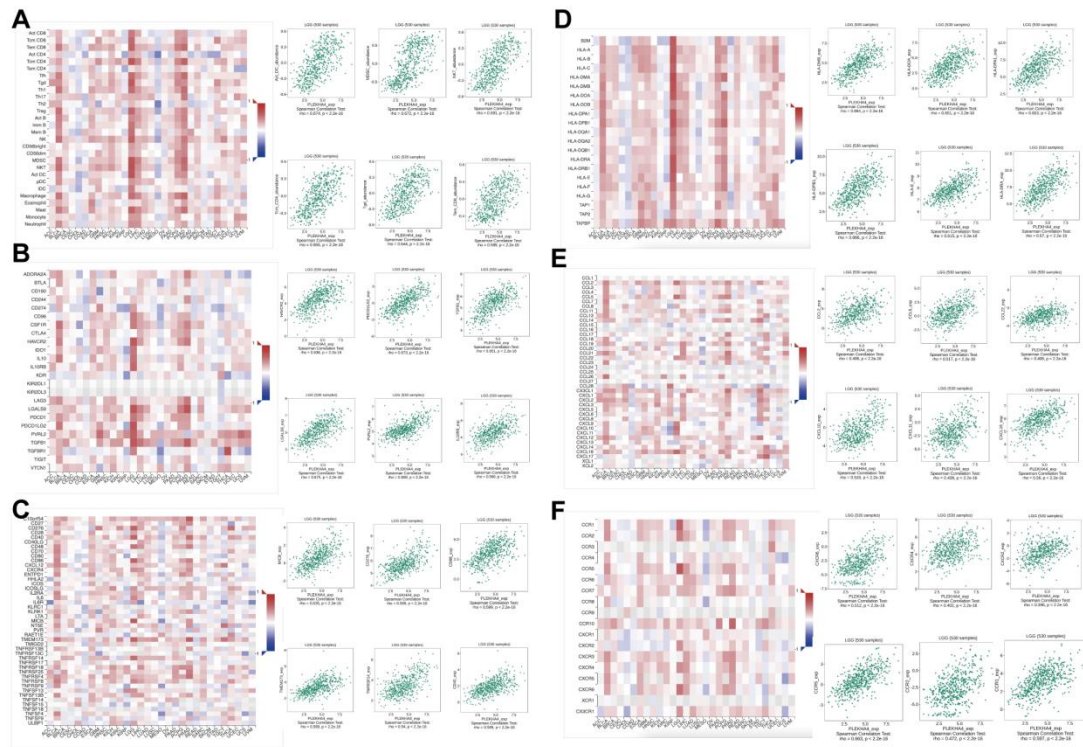

**Supplement Figure 3.** Associations of the PLEKHA4 expression level with lymphocytes, immunomodulators and chemokines in LGG from TISIDB database. (A) Correlations between abundance of tumour-infiltrating lymphocytes (TILs) and PLEKHA4 (plus the six TILs with the highest correlation). (B-D) Correlations between immunomodulators and PLEKHA4 (plus the six immunomodulators with the highest correlation, respectively). (E-F) Correlations between chemokines (or receptors) and PLEKHA4 (plus the six chemokines (or receptors) with the highest correlation, respectively).

## Supplement Figure 4

A

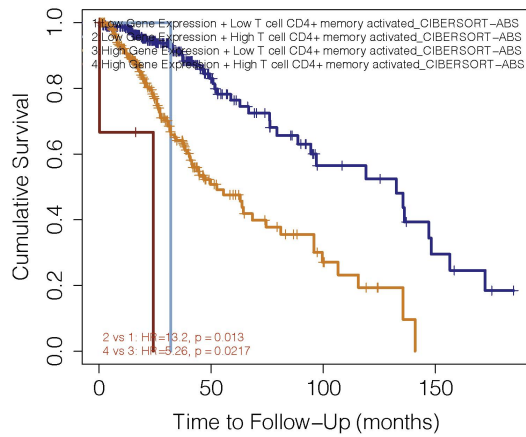

B

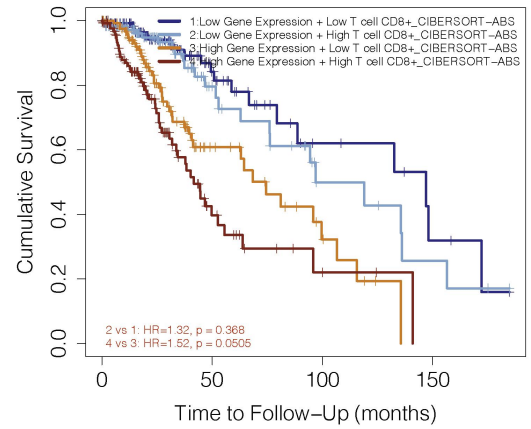

C

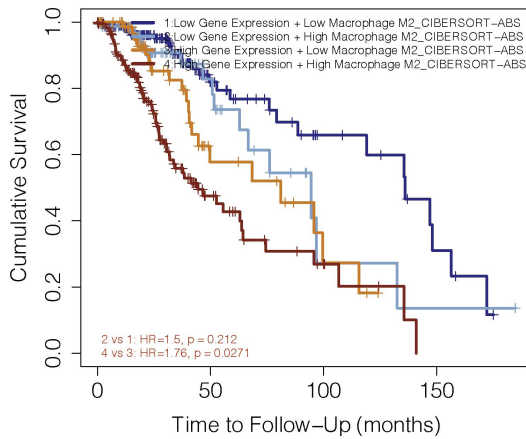

D

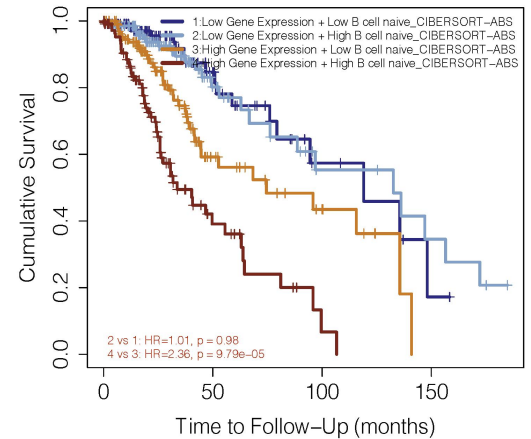

### Supplement Figure 4.

Survival difference between low and high-immune cell infiltration among PLEKHA4 high and low subgroups from TImer database, such as CD4 T cells(A), CD8 T cells(B), M macrophages(C), and B cells(D).
